# Supplementary material for: Bio-Electrochemical System Depollution Capabilities and Monitoring Applications: Models, Applicability, Advanced Bio-Based Concept for Predicting Pollutant Degradation and Microbial Growth Kinetics via Gene Regulation Modelling
Source: MDPI journal article supplement (doi:10.3390/pr9061038), 2021-06-14
Supplement: s1 [file s1]

Archive with 1 entries (1 files):
- processes-1241741-supplementary.pdf
